# Supplementary material for: Study of a Waste Kaolin as Raw Material for Mullite Ceramics and Mullite Refractories by Reaction Sintering
Source: MDPI journal article supplement (doi:10.3390/ma15020583), 2022-01-13
Supplement: s1 [file s1]

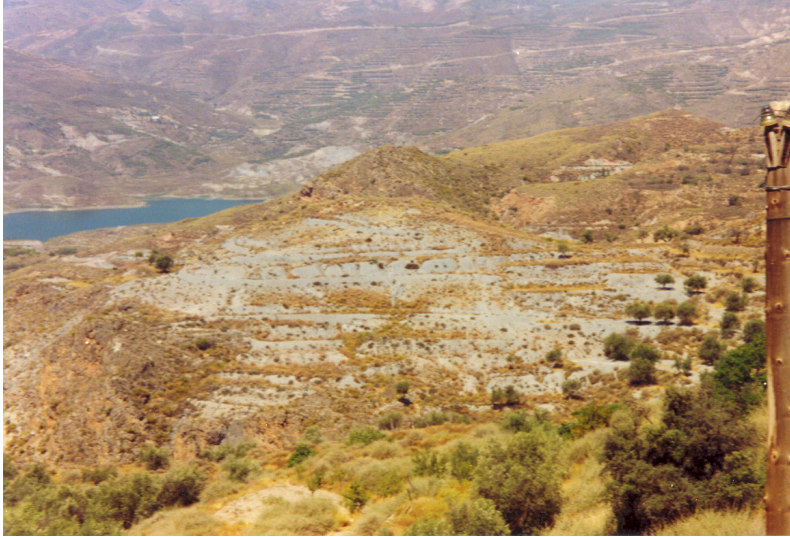

Photography 1: A view of the kaolin deposit.

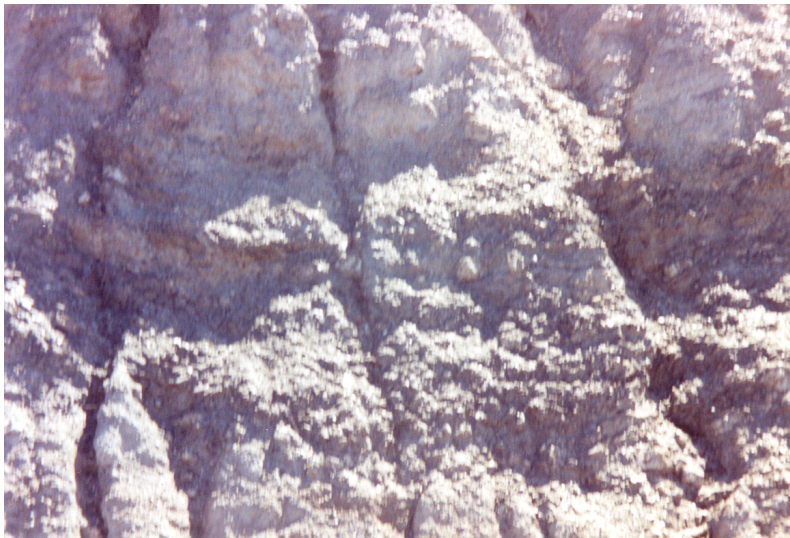

Photography 2: Detail of the raw kaolin where the representative sample was selected to be studied in this investigation.
